# Supplementary material for: Trends in the Burden of Chronic Liver Disease Among Hospitalized US Adults
Source: PubMed Central journal article supplement (PMC7118516; doi:10.1001/jamanetworkopen.2020.1997), 2020-04-02
Supplement: jamanetwopen-3-e201997-s001.pdf [file jamanetwopen-3-e201997-s001.pdf]

## Supplementary Online Content

Hirode G, Saab S, Wong RJ. Trends in the burden of chronic liver disease among hospitalized US adults. *JAMA Netw Open*. 2020;3(4):e201997. doi:10.1001/jamanetworkopen.2020.1997

**eFigure.** Flow Diagram for the Identification of CLD-Related Hospitalizations and Categorization Into the Etiologies of Interest for Trends Analysis

**eTable 1.** List of ICD Codes Used in CLD Definition

**eTable 2.** List of ICD Codes Used for Other Definitions

**eTable 3.** Regression Models for Trends in In-Hospital Mortality and Mean Hospitalization Costs Among CLD-Related Hospitalizations

This supplementary material has been provided by the authors to give readers additional information about their work.

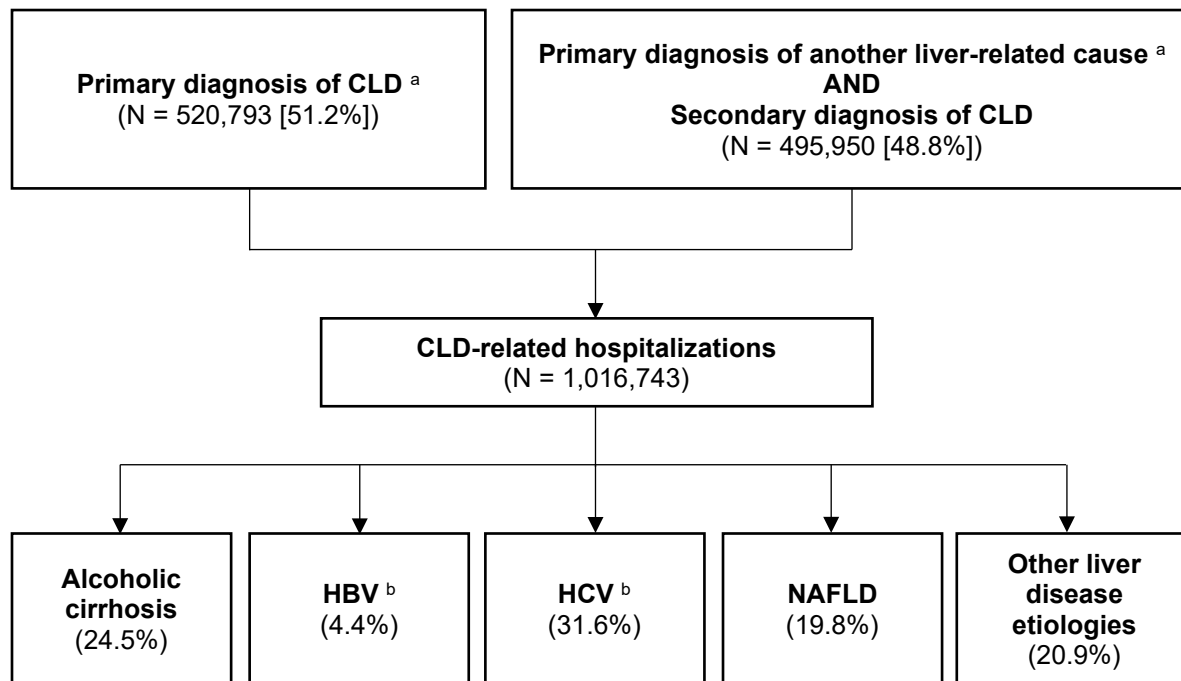

**eFigure. Flow diagram for the identification of CLD-related hospitalizations and categorization into the etiologies of interest for trends analysis.**

<sup>a</sup> See eTable 1 and eTable 2 for ICD codes.

<sup>b</sup> 12,910 hospitalizations were co-infected with HBV and HCV, and were included in both sub-cohorts.

**eTable 1.** List of ICD codes used in CLD definition.

|                                                              | ICD-9-CM                                     | ICD-10-CM                                                                                                                                                                                      |
|--------------------------------------------------------------|----------------------------------------------|------------------------------------------------------------------------------------------------------------------------------------------------------------------------------------------------|
| <b>Definition of chronic liver disease-related diagnosis</b> |                                              |                                                                                                                                                                                                |
| Acute and subacute necrosis of liver                         | 570                                          | K72.0x, K76.2                                                                                                                                                                                  |
| Chronic liver disease and cirrhosis                          | 571.xx                                       | K70.xx, K72.1x, K73.x, K74.xx, K75.4, K75.8x, K76.0, K76.89, K76.9                                                                                                                             |
| Liver abscess and sequelae of chronic liver disease          | 572.x                                        | K72.9x, K75.0-1, K76.6-7                                                                                                                                                                       |
| Malignant neoplasm of liver and intrahepatic bile duct       | 155.x                                        | C22.0-2, C22.7-9                                                                                                                                                                               |
| Other disorders of the liver                                 | 573.x                                        | K71.0-1x, K71.3-9, K72, K75, K75.3, K75.9, K76.1, K76.8x, K76.9, K77                                                                                                                           |
| Viral hepatitis                                              | 070.xx, V02.6x                               | B15.x - B19.xx                                                                                                                                                                                 |
| <b>Diagnosis of another liver-related cause</b>              |                                              |                                                                                                                                                                                                |
| Acute kidney injury                                          | 593.9                                        | N17.9, N28.9                                                                                                                                                                                   |
| Ascites                                                      | 789.5x                                       | K70.11, K70.31, K71.51, R18.x                                                                                                                                                                  |
| Cellulitis                                                   | 681.xx, 682.x                                | K12.2, L03.01x, L03.03x, L03.11x, L03.211, L03.213, L03.221, L03.31x, L03.81x, L03.90                                                                                                          |
| Cholangitis                                                  | 576.1                                        | K83.0x                                                                                                                                                                                         |
| Encephalopathy                                               | 348.3x, 572.2                                | G93.4x, K72.xx                                                                                                                                                                                 |
| Esophageal varices                                           | 456.0-2x                                     | I85.xx                                                                                                                                                                                         |
| Gastrointestinal hemorrhage                                  | 578.x                                        | K92.0-2                                                                                                                                                                                        |
| Hepatorenal syndrome                                         | 572.4                                        | K76.7                                                                                                                                                                                          |
| Hydrothorax                                                  | 511.89                                       | J90, J94.8                                                                                                                                                                                     |
| Hyponatremia                                                 | 276.1                                        | E87.1                                                                                                                                                                                          |
| Infection (including sepsis, pneumonia)                      | 008.xx, 009.x, 038.xx, 041.xx, 480.x - 487.x | A04.xx, A08.xx, A09, A40.x, A41.x, A48.1, A48.3, A48.8, A49.0x, A49.1, A49.8-9, B25.0, B44.0, B44.1, B49, B95.xx, B96.xx, J10.0x, J11.0x, J12.xx, J13, J14, J15.xx, J16.x, J17, J18.0-1, J18.9 |
| Jaundice                                                     | 782.4                                        | R17                                                                                                                                                                                            |
| Liver failure                                                | 570                                          | K70.4x, K72.xx                                                                                                                                                                                 |
| Peritonitis                                                  | 567.xx                                       | K65.x, K67, K68.12, K68.19, K68.9                                                                                                                                                              |
| Portal hypertension                                          | 572.3                                        | K76.6                                                                                                                                                                                          |
| Portal vein thrombosis or deep vein thrombosis               | 451.xx - 454.x                               | I80.1x - I80.9, I81, I82.0 - I82.70x, I82.72x, I82.Axx - I82.Cxx, I82.89x, I82.9x                                                                                                              |
| Renal failure                                                | 585.x, 586, 794.4                            | N18.x, N19, R94.4                                                                                                                                                                              |
| Sepsis                                                       | 038.xx, 785.52, 995.91, 995.92               | A40.x, A41.x, R65.2x                                                                                                                                                                           |
| Volume overload or dehydration                               | 276.51, 276.6x, 782.3                        | E86.0, E87.7x, R60.x                                                                                                                                                                           |

**eTable 2.** List of ICD codes used for other definitions.

|                                                                   | <b>ICD-9-CM</b>                                                                                               | <b>ICD-10-CM</b>                                                                                               |
|-------------------------------------------------------------------|---------------------------------------------------------------------------------------------------------------|----------------------------------------------------------------------------------------------------------------|
| Autoimmune hepatitis                                              | 571.42                                                                                                        | K75.4                                                                                                          |
| Alcohol use disorder                                              | 291.xx, 303.xx, 305.0x,<br>357.5, 425.5, 571.0-3, V11.3                                                       | F10.xxx, G62.1, I42.6, K70.xx                                                                                  |
| Budd-Chiari syndrome                                              | 453.0                                                                                                         | I82.0                                                                                                          |
| Coronary artery disease                                           | 414.xx                                                                                                        | I25.xxx                                                                                                        |
| Congestive heart failure                                          | 398.91, 402.01, 402.11,<br>402.91, 404.01, 404.03,<br>404.11, 404.13, 404.91,<br>404.93, 428.xx, 429.4, 997.1 | I09.81, I11.0, I13.0, I13.2, I50.xxx,<br>I97.0, I97.110, I97.130, I97.190,<br>I97.710, I97.790, I97.88, I97.89 |
| Chronic liver disease with<br>mention of alcohol                  | 571.0-3                                                                                                       | K70.xx                                                                                                         |
| Chronic passive congestion of<br>liver                            | 573.0                                                                                                         | K76.1                                                                                                          |
| Cirrhosis                                                         | 571.2, 571.5, 567.23, 572.2,<br>572.4, 456.0-2x, 789.5x                                                       | I85.xx, K65.2, K70.11, K70.2-4x,<br>K71.51, K71.7, K72.xx, K74.0-2,<br>K74.6x, K76.7, R18.x                    |
| Chronic kidney disease                                            | 585.x, 586, 794.4                                                                                             | N18.x, N19, R94.4                                                                                              |
| Clonorchiasis                                                     | 121.1                                                                                                         | B66.1                                                                                                          |
| Diabetes                                                          | 250.xx                                                                                                        | E10.xxxx - E11.xxxx                                                                                            |
| Disorders of porphyrin and<br>bilirubin metabolism                | 277.1, 277.4                                                                                                  | E80.xx                                                                                                         |
| Dyslipidemia                                                      | 272.0-4                                                                                                       | E78.0x-5                                                                                                       |
| Echinococcus of liver                                             | 122.0, 122.5, 122.8                                                                                           | B67.0, B67.5, B67.8                                                                                            |
| Fascioliasis                                                      | 121.3                                                                                                         | B66.3                                                                                                          |
| Gaucher disease                                                   | 272.7                                                                                                         | E75.21-22, E75.249, E77.0-1                                                                                    |
| Hemachromatosis                                                   | 275.0x                                                                                                        | E83.1xx                                                                                                        |
| Hepatitis A virus                                                 | 070.0, 070.1                                                                                                  | B15.x                                                                                                          |
| Hepatitis B virus                                                 | 070.2x, 070.3x, V02.61                                                                                        | B16.x, B18.0-1, B19.1x                                                                                         |
| Hepatitis C virus                                                 | 070.41, 070.44, 070.51,<br>070.54, 070.7x, V02.62                                                             | B17.1x, B18.2, B19.2x                                                                                          |
| Hepatic encephalopathy                                            | 572.2                                                                                                         | K72.xx                                                                                                         |
| Hepatocellular carcinoma                                          | 155.0                                                                                                         | C22.0, C22.7, C22.8                                                                                            |
| Hypertension                                                      | 401.x                                                                                                         | I10, I16.xx                                                                                                    |
| Lysosomal acid lipase<br>deficiency and other lipoid<br>disorders | 272.8-9                                                                                                       | E78.8x, E78.9                                                                                                  |
| Obesity                                                           | 278.00, 278.01, 278.03,<br>V85.3x, V85.4x                                                                     | E66.0x-2, E66.8-9, Z68.3x-4x                                                                                   |
| Opisthorchiasis                                                   | 121.0                                                                                                         | B66.0                                                                                                          |
| Other amyloidosis                                                 | 277.3x                                                                                                        | E85.xx                                                                                                         |
| Other deficiencies of circulating<br>enzymes                      | 277.6                                                                                                         | D84.1                                                                                                          |

|                                                    |                                                                                                                                  |                                                                                                                                  |
|----------------------------------------------------|----------------------------------------------------------------------------------------------------------------------------------|----------------------------------------------------------------------------------------------------------------------------------|
| Other specified/unspecified disorders of the liver | 573.1-3, 573.8-9                                                                                                                 | K71.xx, K74.4, K75.0-4, K76.2-5                                                                                                  |
| Other viral hepatitis                              | 070.4, 070.42, 070.43, 070.49, 070.5, 070.52, 070.53, 070.59, 070.6, 070.9, 571.4, 571.40, 571.41, 571.49, V02.6, V02.60, V02.69 | B17.0, B17.2, B17.8-9, B18.8-9, B19.0, B19.9, K71.6, K73.x                                                                       |
| Pneumonia                                          | 480.x - 486, 487.0                                                                                                               | A37.01, A37.11, A37.81, A37.91, A48.1, B25.0, B44.0, B44.1, J10.0x, J11.0x, J12.xx, J13, J14, J15.xx, J16.x, J17, J18.0-1, J18.9 |
| Primary biliary cholangitis                        | 571.6                                                                                                                            | K74.3, K74.5                                                                                                                     |
| Primary sclerosing cholangitis                     | 576.1                                                                                                                            | K83.01                                                                                                                           |
| Stroke                                             | 430 - 438.xx                                                                                                                     | G45.x, G46.x, I60.xx - I69.xx                                                                                                    |
| Syphilis of the liver                              | 095.3                                                                                                                            | A52.74                                                                                                                           |
| Wilson's disease                                   | 275.1                                                                                                                            | E83.0x                                                                                                                           |

**eTable 3.** Regression models for trends in in-hospital mortality and mean hospitalization costs among CLD-related hospitalizations<sup>a</sup>.

|             | In-hospital mortality |        | Mean hospitalization costs |       |
|-------------|-----------------------|--------|----------------------------|-------|
|             | OR (95% CI)           | P      | % change (95% CI)          | P     |
| <b>Year</b> | 0.96 (0.95-0.96)      | <0.001 | 0.62% (0.07% - 1.18%)      | 0.028 |

<sup>a</sup> Adjusted for demographic (age, sex, race and insurance status), etiologies (presence of hepatitis B virus, hepatitis C virus, alcoholic cirrhosis, nonalcoholic fatty liver disease), presence of hepatocellular carcinoma, presence of cirrhosis and complications (0, 1,  $\geq 2$ ), and comorbidities (coronary artery disease, congestive heart failure, chronic kidney disease, diabetes, dyslipidemia, hypertension, obesity, pneumonia, stroke).
